# Supplementary material for: Turn-Directed α-β Conformational Transition of α-syn12 Peptide at Different pH Revealed by Unbiased Molecular Dynamics Simulations
Source: Int J Mol Sci. 2013 May 24;14(6):10896–907. doi: 10.3390/ijms140610896 (PMC3709708; doi:10.3390/ijms140610896)

## Supplementary Information

**Figure S1.** Turn (a),  $\beta$ -strand (b) and bend (c) occurrence probabilities for  $\alpha$ -syn12 peptide at physiological pH (black) and acidic pH (red) with program DSSP.

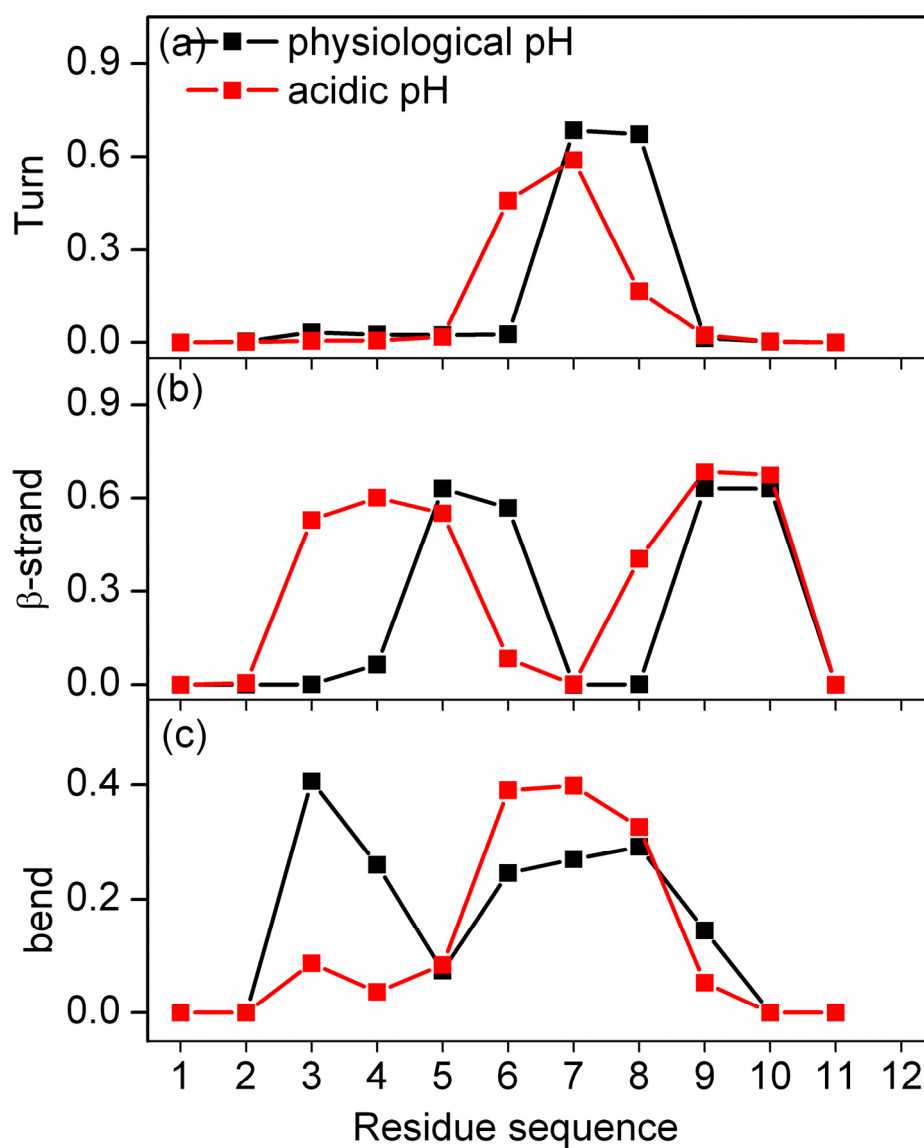

Supplement: Supplementary file 1 [file ijms-14-10896-s001.pdf]
